# Supplementary material for: Virus, allergic sensitisation and cortisol in infant bronchiolitis and risk of early asthma
Source: PubMed Central journal article supplement — ERJ Open Res. 2020 Mar 16;6(1):00268-2019. doi: 10.1183/23120541.00268-2019 (PMC7073413; doi:10.1183/23120541.00268-2019), 2020-03-16
Supplement: 00268-2019.supplement.pdf [file 00268-2019.supplement.pdf]

Supplementary material to the manuscript:

**Virus, allergic sensitisation and cortisol in infant bronchiolitis and risk of early asthma**

Jon Olav Gjengstø Hunderi, MD<sup>a,b,c</sup>, Leif Bjarne Rolfsjord, MD<sup>c,d</sup>, Karin C. Lødrup Carlsen, MD Dr.med<sup>b,c</sup>, René Holst, MSc PhD<sup>e</sup>, Egil Bakkeheim, MD PhD<sup>b</sup>, Teresa Løvold Berents MD PhD<sup>c,e</sup>, Kai-Håkon Carlsen, MD Dr.med<sup>b,c</sup>, Håvard Ove Skjerven, MD PhD<sup>b,c</sup>

**Affiliations:** <sup>a</sup>Department of Pediatrics and Adolescent Medicine, Østfold Hospital Trust, Norway; <sup>b</sup>Division of Pediatric and Adolescent Medicine, Oslo University Hospital, Oslo, Norway; <sup>c</sup>Institute of Clinical Medicine, Faculty of Medicine, University of Oslo, Oslo, Norway; <sup>d</sup>Department of Pediatrics, Innlandet Hospital Trust, Elverum, Norway; <sup>e</sup>Oslo Centre for Biostatistics and Epidemiology, Faculty of Medicine, University of Oslo, Oslo, Norway; <sup>f</sup>Department of Dermatology, Oslo University Hospital, Norway

A study performed within ORAACLE (the Oslo Research Group of Asthma and Allergy in Childhood; the Lung and Environment).

**Address correspondence to:** Jon Olav Gjengstø Hunderi, Department of Pediatrics and Adolescent Medicine, Østfold Hospital Trust, Postboks 300, 1714 Grålum, Norway, [jonhun@so-hf.no], 0047 91880816

## **SUBJECTS AND METHODS**

### **Methods**

Educational level was categorized into 1- no school completed, 2- primary school completed, 3- secondary school completed, 4- higher education, up to three years and 5 higher education, more than three years.

Nasopharyngeal aspirates were collected using standardized procedure performed by trained paediatric nurses at study inclusion, using a tracheal suction set, and immediately frozen at -20°C.

**Table S1** The Clinical Score used in the study (1), Kristjansson et.al.

|                                | <b>Score 0</b> | <b>Score 1</b>                 | <b>Score 2</b>                                            |
|--------------------------------|----------------|--------------------------------|-----------------------------------------------------------|
| Respiratory rate (breaths/min) | <40            | 40-60                          | >60                                                       |
| Respiratory Chest recessions   | none           | Moderate<br>Costodiaphragmatic | Severe. As 1+ rib and<br>jugular retractions              |
| Auscultatory breath sounds     | Vesicular      | Wheeze,<br>rales/ronchi        | Faint ± severe wheeze<br>± pronounced rales<br>and rhonci |
| Skin colour                    | Normal         | Pallor                         | Cyanosis                                                  |
| General Condition              | Not affected   | Moderately affected            | Severely affected                                         |

The clinical score was completed by doctors at inclusion and daily during hospital stay. A clinical score  $\geq$ four of ten was required for study inclusion. The score is identical to that used in a study of acute bronchiolitis by Kristjansson et al (1).

**Table S2** Background Characteristics of the 404 infants hospitalised with acute bronchiolitis, comparing those attending two- years follow-up and those who did not.

|                                                  | Attending two-<br>years follow-up<br>n= 294 (72.8) | No two- years<br>follow-up<br>n= 110 (27.2) | p                |
|--------------------------------------------------|----------------------------------------------------|---------------------------------------------|------------------|
| <b>At birth</b>                                  |                                                    |                                             |                  |
| <i>Male sex n (%)</i>                            | 181/294 (61.6)                                     | 59/110 (53.6)                               | 0.15             |
| Gestational age (GA) weeks (SD)                  | 38.6 (3.3)                                         | 38.8 (2.8)                                  | 0.54             |
| Born at GA<37 weeks, n (%)                       | 46/294 (15.6)                                      | 14/110 (12.7)                               | 0.46             |
| <i>Birth weight, grams (SD)</i>                  | 3424 (641)                                         | 3450 (615)                                  | 0.74             |
| <b>At enrolment</b>                              |                                                    |                                             |                  |
| Age, days (range)                                | 124.6 (7,363)                                      | 134.6 (10, 364)                             | 0.31             |
| Weight, grams (SD)                               | 6442 (1847)                                        | 6692 (1942)                                 | 0.23             |
| Eczema n (%)                                     | 29/271 (10.7)                                      | 11/103 (10.7)                               | 1                |
| One previous episode of wheeze                   | 69/ 260 (26.5)                                     | 29/ 102 (28.4)                              | 0.72             |
| Length of hospital stay, hours (SD)              | 80.3 (66.0)                                        | 80.0 (70.9)                                 | 0.97             |
| Need of supportive treatment, n (%)              | 152/294 (51.7)                                     | 52/110 (47.3)                               | 0.43             |
| <b>Virus detected during acute bronchiolitis</b> |                                                    |                                             |                  |
| RSV, n (%)                                       | 219/266 (82.3)                                     | 81/97 (83.5)                                | 0.79             |
| HRV, n (%)                                       | 93/266 (35.0)                                      | 29/97 (29.9)                                | 0.37             |
| HRV A or B, n (%)                                | 28/266 (10.5)                                      | 7/97 (7.2)                                  | 0.34             |
| HRV C, n (%)                                     | 65/266 (24.4)                                      | 22/97 (22.7)                                | 0.73             |
| RSV, high genomic load, n (%)                    | 145/266 (54.5)                                     | 55/97 (56.7)                                | 0.71             |
| HRV, high genomic load, n (%)                    | 16/266 (6.0)                                       | 7/97 (7.2)                                  | 0.68             |
| More than 1 virus, n (%)                         | 170/ 266 (63.9)                                    | 54/97 (55.7)                                | 0.15             |
| <b>Allergic sensitisation, IgE ≥ 0.35</b>        |                                                    |                                             |                  |
| Any sensitisation, n (%)                         | 22/271 (8.1)                                       | 9/97 (9.3)                                  | 0.72             |
| Any food sensitisation, n (%)                    | 20/271 (7.4)                                       | 8/97 (8.2)                                  | 0.78             |
| Any inhalant sensitisation, n (%)                | 5/267 (1.9)                                        | 2/97 (2.1)                                  | 0.91             |
| Egg sensitisation, n (%)                         | 8/271 (3.0)                                        | 4/97 (4.1)                                  | 0.58             |
| Cow's milk sensitisation, n (%)                  | 13/271 (4.8)                                       | 4/97 (4.1)                                  | 0.79             |
| Peanut sensitisation, n (%)                      | 3/271 (1.1)                                        | 1/97 (1.0)                                  | 0.95             |
| Polysensitisation, n (%)                         | 6/268 (2.2)                                        | 1/97 (1.0)                                  | 0.46             |
| Cortisol geometric mean, mmol/l (95% CI)         | 42.0 (32.9, 53.7)                                  | 35.2 (30.9, 10.0)                           |                  |
| <b>Parental education</b>                        |                                                    |                                             |                  |
| <i>Maternal Education<sup>a</sup> (SD)</i>       | 3.99 (0.98)                                        | 3.47 (0.98)                                 | <b>&lt;0.001</b> |
| <i>Paternal Education<sup>a</sup> (SD)</i>       | 3.85 (1.0)                                         | 3.57 (0.92)                                 | <b>0.019</b>     |
| <b>Parental allergic diseases</b>                |                                                    |                                             |                  |
| Any n (%)                                        | 128/258 (49.6)                                     | 46/99 (46.5)                                | 0.59             |
| <i>Maternal Asthma, n (%)</i>                    | 36/ 235 (15.3)                                     | 12/90 (13.3)                                | 0.65             |
| <i>Paternal Asthma, n (%)</i>                    | 31/235 (13.2)                                      | 12/90 (13.3)                                | 0.97             |
| Maternal Rhinoconjunctivitis, n (%)              | 42/258 (16.3)                                      | 20/98 (20.4)                                | 0.36             |
| <i>Paternal Rhinoconjunctivitis, n (%)</i>       | 56/258 (21.7)                                      | 14/98 (14.3)                                | 0.12             |
| Maternal eczema, n (%)                           | 31/263 (11.8)                                      | 9/98 (9.2)                                  | 0.48             |
| <i>Paternal eczema, n (%)</i>                    | 25/263 (9.5)                                       | 4/ 98 (4.1)                                 | 0.092            |
| <b>Environment</b>                               |                                                    |                                             |                  |
| Smoking at home n (%)                            | 38/253 (15.0)                                      | 20/88 (22.7)                                | 0.097            |

<sup>a</sup> Education was categorised from 1 (no school completed) to 5 (higher education, more than three years)

**Table S3** The distribution of low sensitisation defined by IgE 0.10- 0.34 kU/l before one year of age, of the 294 infants hospitalised with bronchiolitis and attending two- year follow up, shown for those with and without recurrent wheeze.

|                                   | Recurrent wheeze<br>n= 143 (48.6) | No recurrent wheeze<br>n= 151 (51.4) | p    |
|-----------------------------------|-----------------------------------|--------------------------------------|------|
| <b>Low Allergic sensitisation</b> |                                   |                                      |      |
| Any sensitisation, n (%)          | 18/130 (13.8)                     | 17/141 (12.1)                        | 0.66 |
| Any food sensitisation, n (%)     | 18/130 (13.8)                     | 17/141 (12.1)                        | 0.66 |
| Any inhalant sensitisation, n (%) | 15/129 (11.6)                     | 14/138 (10.1)                        | 0.70 |
| Egg sensitisation, n (%)          | 18/130 (13.8)                     | 17/141 (12.1)                        | 0.66 |
| Cow's milk sensitisation, n (%)   | 15/130 (11.5)                     | 16/141 (11.3)                        | 0.96 |
| Peanut sensitisation, n (%)       | 15/130 (11.5)                     | 15/141 (10.6)                        | 0.81 |

Fig S1

The figure shows the distribution of the viruses analysed in 266 infants hospitalized with bronchiolitis disease (RSV 53%, HRV and RSV 29.3%, HRV 5.6%, other viruses 3.4%, no virus detected 8.6%)

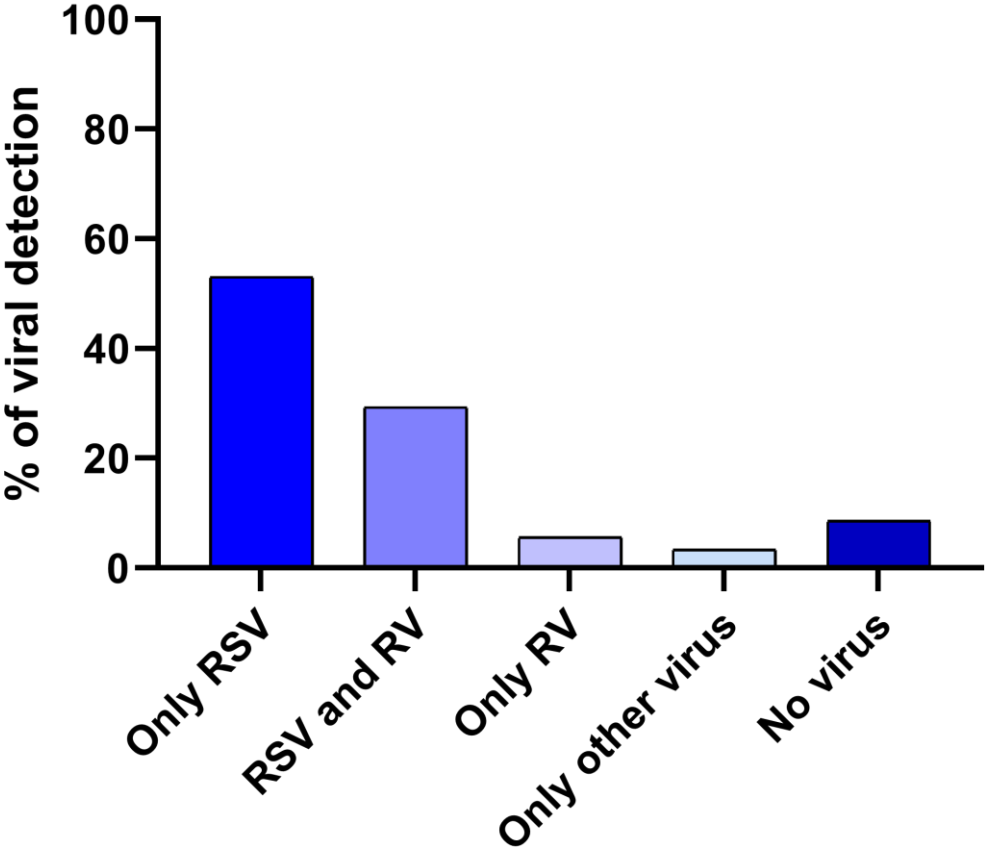

## REFERENCES

1. Kristjansson S, Lodrup Carlsen KC, Wennergren G, Strannegard IL, Carlsen KH. Nebulised racemic adrenaline in the treatment of acute bronchiolitis in infants and toddlers. *Archives of disease in childhood*. 1993;69(6):650-4.
